# Supplementary figures and images for: Cellulose fatty acid esters as sustainable film materials – effect of side chain structure on barrier and mechanical properties
Source: Royal Society of Chemistry journal article supplement (doi:10.1039/c5ra12671a), 2015-01-01

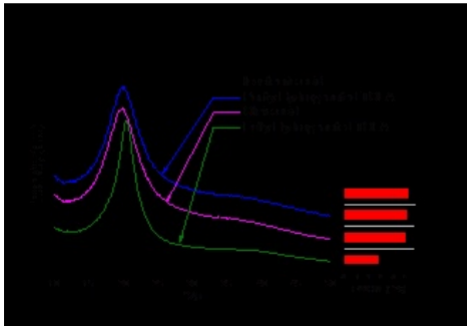

Supplement: c5ra12671a2.pdf [file c5ra12671a2.pdf]
